# Supplementary material for: High serum IL-6 correlates with reduced clinical benefit of atezolizumab and bevacizumab in unresectable hepatocellular carcinoma
Source: PubMed Central journal article supplement — JHEP Rep. 2023 Jan 16;5(4):100672. doi: 10.1016/j.jhepr.2023.100672 (PMC9972403; doi:10.1016/j.jhepr.2023.100672), 2023-01-16
Supplement: mmc1.pdf [file mmc1.pdf]

# **High serum IL-6 correlates with reduced clinical benefit of atezolizumab and bevacizumab in unresectable hepatocellular carcinoma**

Hannah Yang, Beodeul Kang, Yeonjung Ha, Sung Hwan Lee,  
Ilhwan Kim, Hyeyeong Kim, Won Suk Lee, Gwangil Kim, Sanghoon Jung, Sun  
Young Rha, Vincent E. Gaillard, Jaekyung Cheon, Chan Kim, Hong Jae Chon

## Table of contents

|                              |   |
|------------------------------|---|
| Fig. S1.....                 | 2 |
| Fig. S2.....                 | 3 |
| Fig. S3.....                 | 4 |
| Fig. S4.....                 | 5 |
| Supplementary materials..... | 6 |

**Fig. S1. CONSORT diagram**

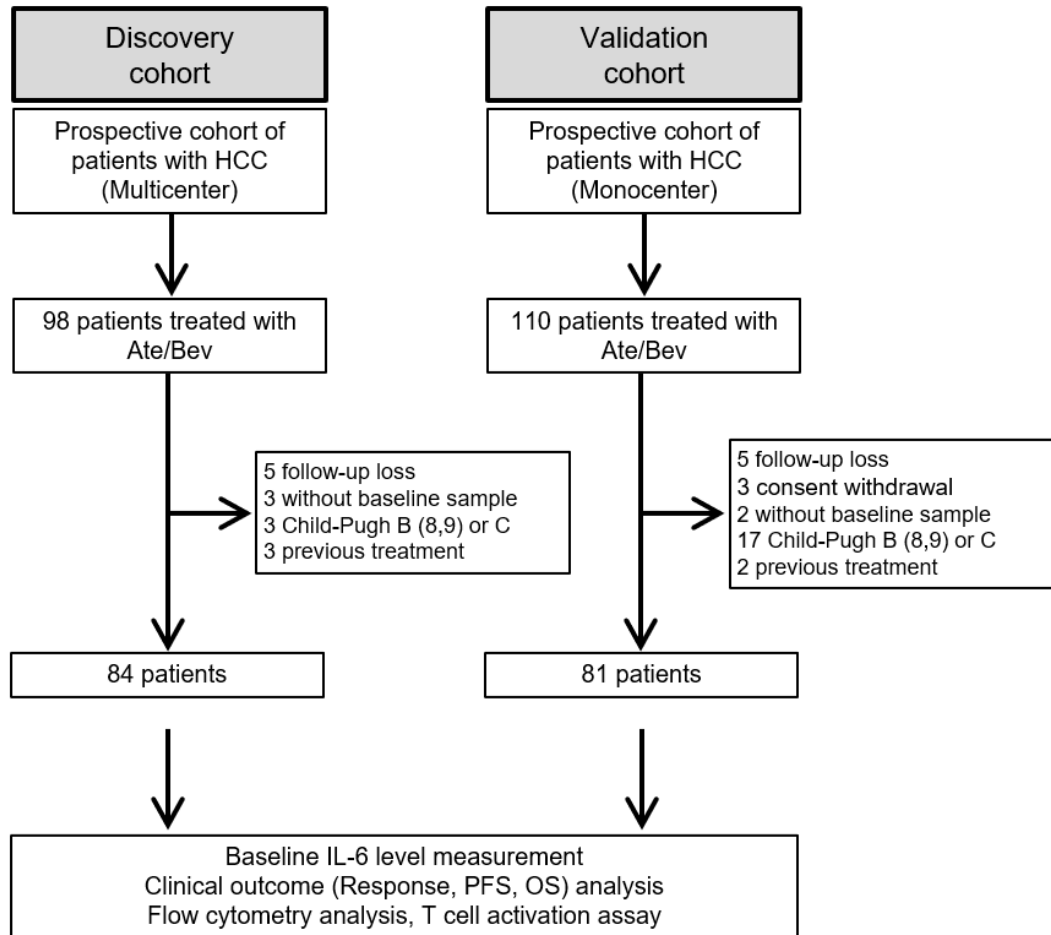

**Fig. S2. Determination of IL-6 cutoff using maximally selected rank statistics**

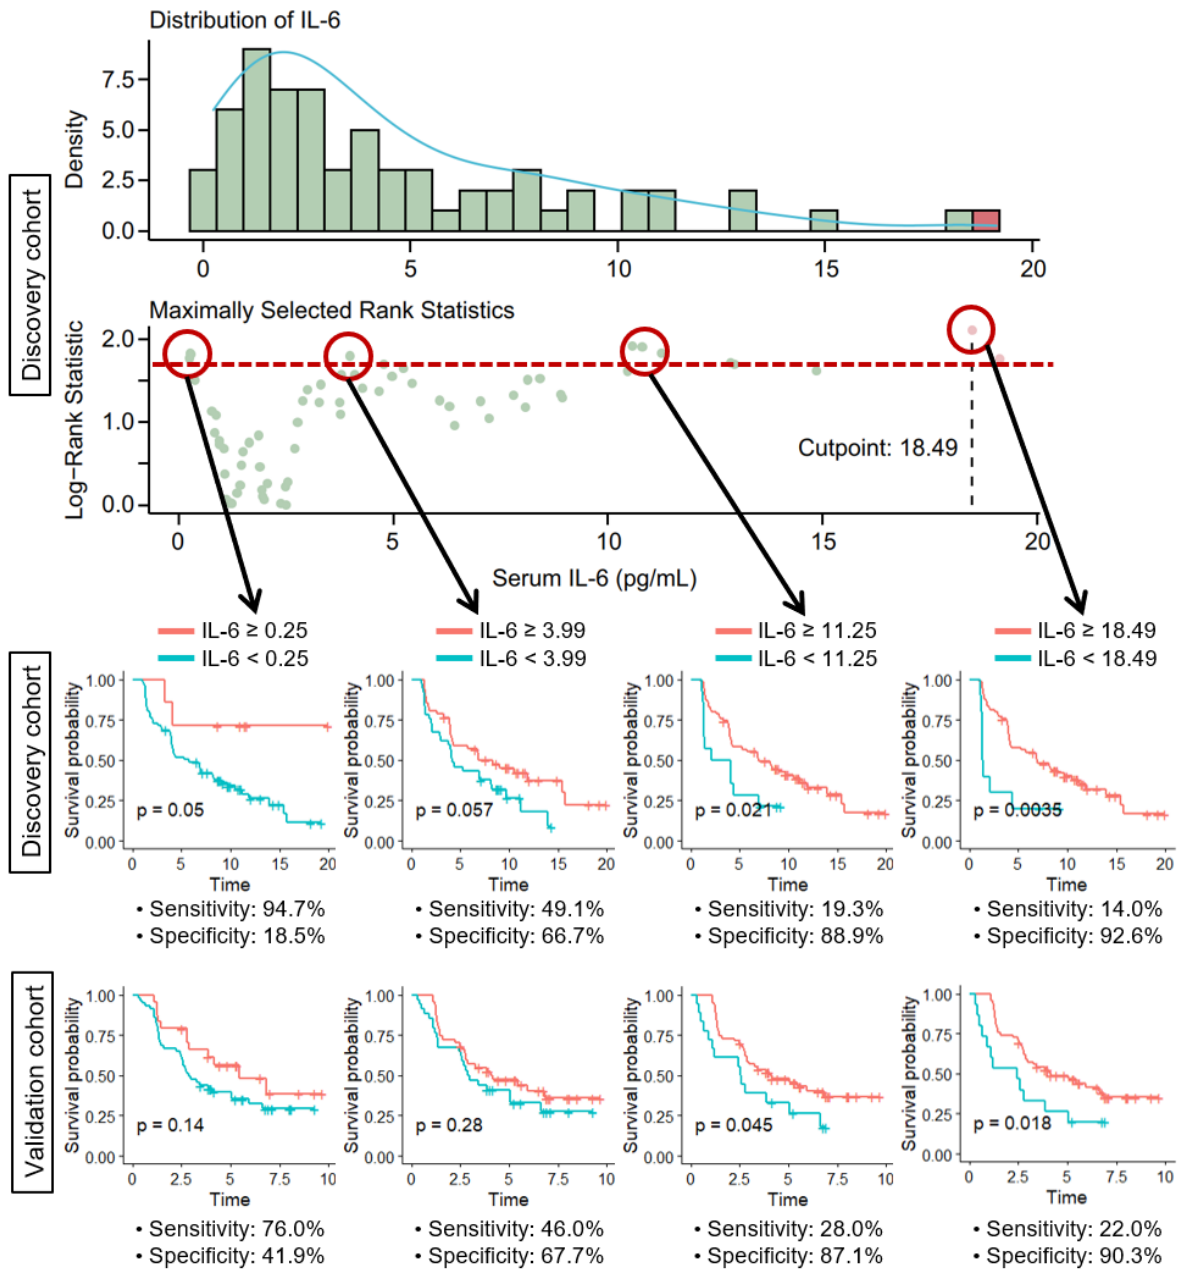

**Fig. S3. Immune cell subsets by CIBERSORT analysis according to serum IL-6 levels**

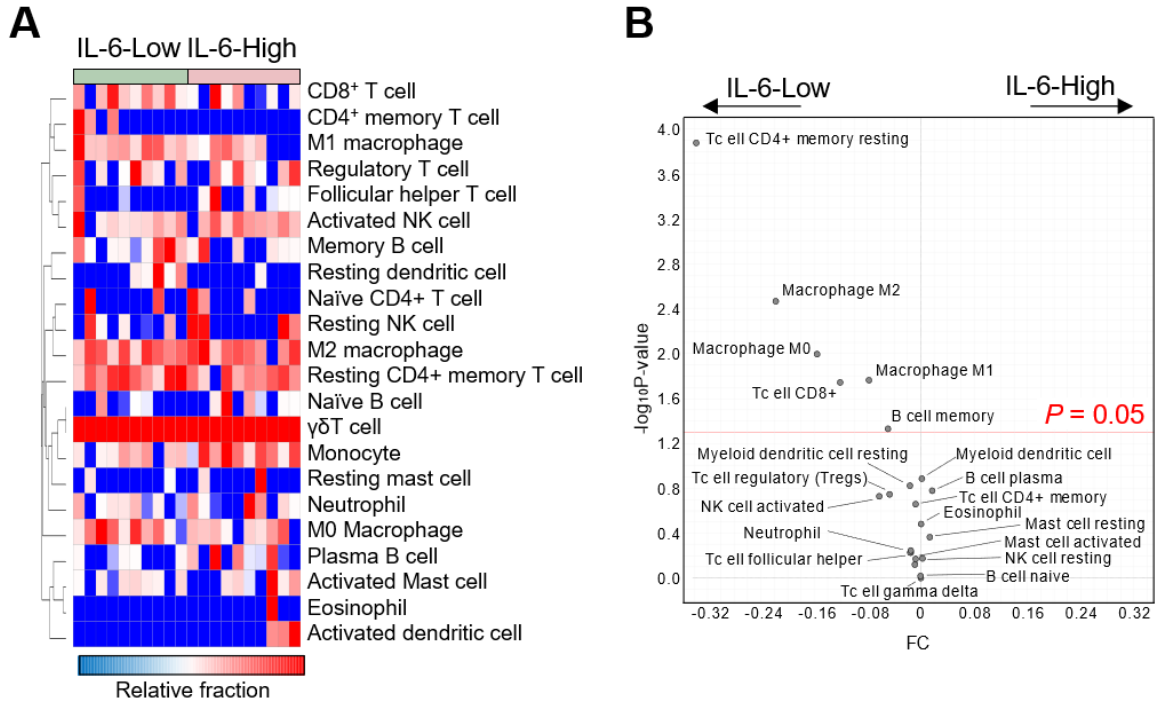

**Fig. S4. Comparison between clinical benefit 6 (CB<sub>6m</sub>) month and disease control rate**

**Clinical benefit 6 month (CB<sub>6m</sub>) = CR + PR + SD with PFS ≥ 6 months**

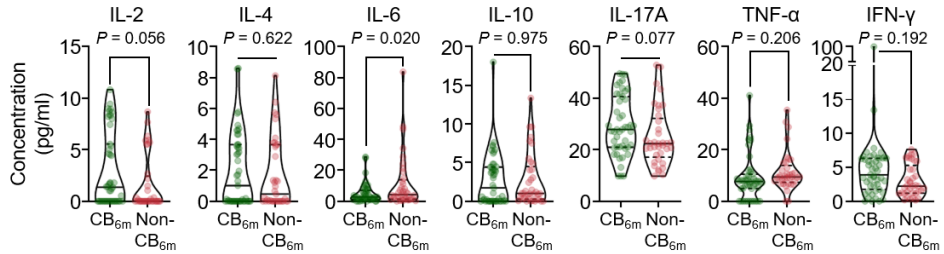

**Disease control = CR + PR + SD (regardless of PFS duration)**

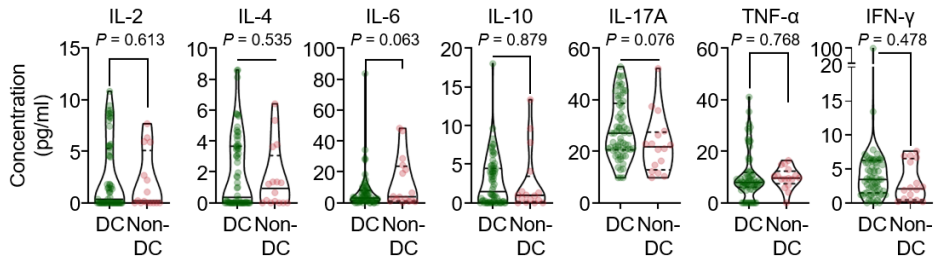

## Supplementary materials

### List of antibodies

| <b>Name</b>                                                   | <b>Provider</b> | <b>Cat. #</b> |
|---------------------------------------------------------------|-----------------|---------------|
| Fixable Viability Dye eFluor™ 780                             | eBioscience     | 65-0865-14    |
| anti-Human CD3 APC (clone: SK7)                               | eBioscience     | 17-0036-41    |
| anti-Human CD4 PE-Cy7 (clone: RPA-T4)                         | BioLegend       | 300512        |
| anti-Human CD8 eFluor™506 (clone: RPA-T8)                     | eBioscience     | 69-0088-41    |
| anti-Human interferon- $\gamma$ PE (clone B27)                | BD Biosciences  | 562016        |
| anti-Human tumor necrosis factor- $\alpha$ V450 (clone Mab11) | BD Biosciences  | 561311        |
| anti-Human CD8 (clone: SP57)                                  | Ventana         | 790-4460      |
| anti-Human CD4 (clone: SP35)                                  | Abcam           | Ab213215      |
